# Supplementary material for: Multifunctional buried interface modification for efficient and stable SnO2-based perovskite solar cells
Source: Royal Society of Chemistry journal article supplement (doi:10.1039/d4ta00108g), 2024-01-01
Supplement: d4ta00108g1.pdf [file d4ta00108g1.pdf]

---

## Appendix A. Electronic Supplementary Material

### Multifunctional buried interface modification for efficient and stable SnO<sub>2</sub>-based perovskite solar cells

Rui Wu,<sup>a</sup> Junhua Meng,<sup>\*a</sup> Yiming Shi,<sup>a</sup> Zhengchang Xia,<sup>b,c</sup> Chunxia Yan,<sup>a</sup> Lisheng Zhang,<sup>a</sup> Wenkang Liu,<sup>a</sup> Jinliang Zhao,<sup>a</sup> Jinxiang Deng<sup>a</sup> and Xingwang Zhang<sup>b,c</sup>

<sup>a</sup> School of Physics and Optoelectronic Engineering, Beijing University of Technology, Beijing 100124, P. R. China E-mail: [jhmeng@bjut.edu.cn](mailto:jhmeng@bjut.edu.cn)

<sup>b</sup> Key Lab of Semiconductor Materials Science, Institute of Semiconductors, Chinese Academy of Sciences, Beijing 100083, P. R. China

<sup>c</sup> Center of Materials Science and Optoelectronics Engineering, University of Chinese Academy of Sciences, Beijing 100049, P. R. China

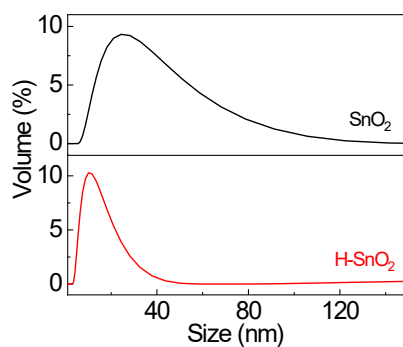

**Fig. S1.** DLS measurements of the dispersion of pristine SnO<sub>2</sub> and H-SnO<sub>2</sub>.

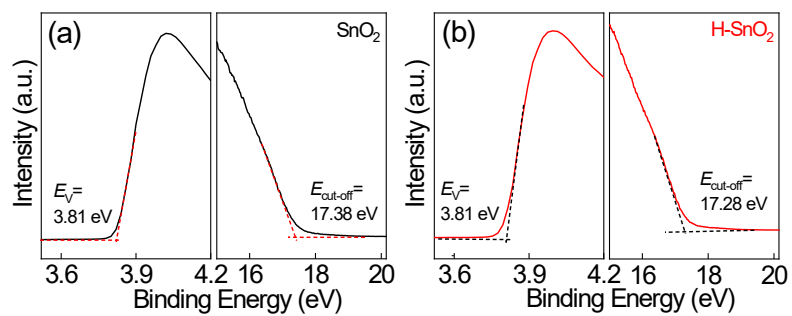

**Fig. S2.** The UPS spectra of (a) pristine SnO<sub>2</sub> and (b) H-SnO<sub>2</sub> film, where the secondary electron cutoff and the Fermi edge are focused.

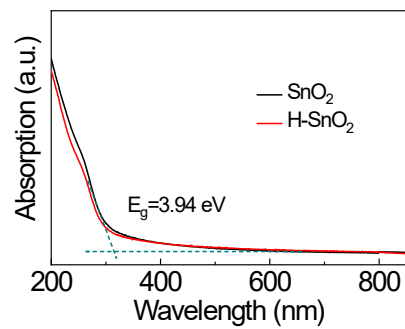

**Fig. S3.** The UV-vis absorption spectra of the pristine SnO<sub>2</sub> and H-SnO<sub>2</sub> film, from which the bandgap of the samples is estimated to be 3.94 eV.

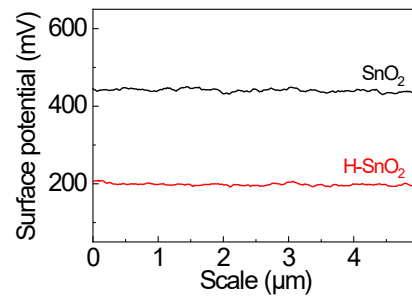

**Fig. S4.** The surface potential profiles of the pristine SnO<sub>2</sub> and H-SnO<sub>2</sub> films taken at the positions marked by white line in the KPFM images (Fig. 1e and 1f).

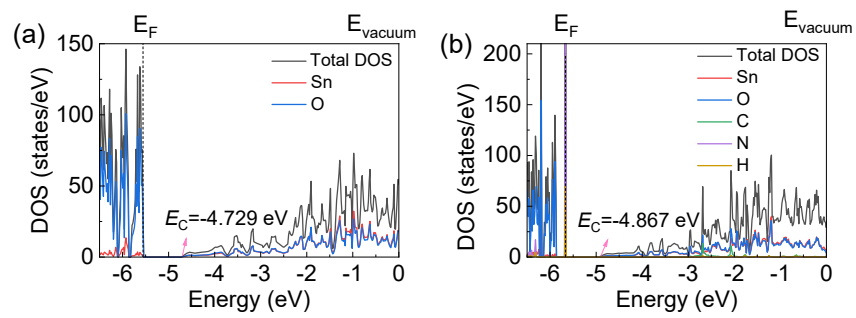

**Fig. S5.** Electronic DOS of (a) SnO<sub>2</sub>, (b) H-SnO<sub>2</sub>.

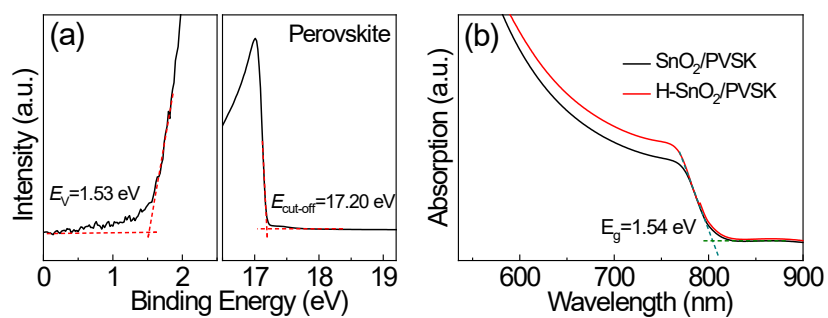

**Fig. S6.** (a) The UPS spectra of perovskite film, (b) UV-vis absorption spectra of the perovskite films deposited on SnO<sub>2</sub> ETLs.

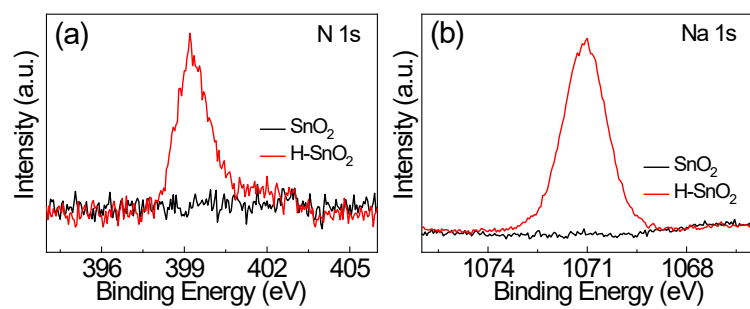

**Fig. S7.** XPS core-level spectra of (a) N 1s and (b) Na 1s for SnO<sub>2</sub> and H-SnO<sub>2</sub> film.

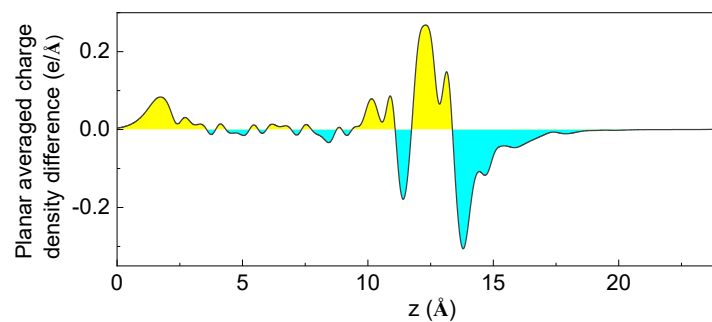

**Fig. S8.** Plane-averaged charge density difference of SnO<sub>2</sub>/HEDTA interface, the cyan and yellow regions correspond to the charge depletion and accumulation regions, respectively.



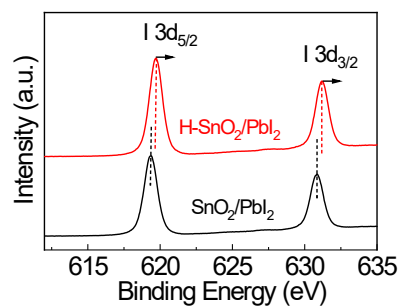

**Fig. S9.** I 3d core-level spectra for the PbI<sub>2</sub> films coated on SnO<sub>2</sub> and H-SnO<sub>2</sub> ETLs.

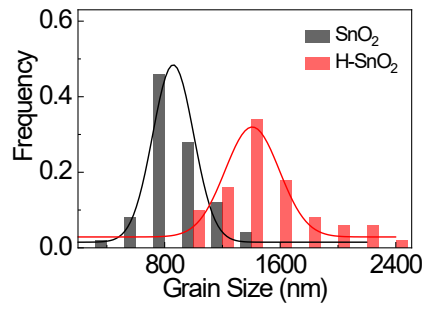

**Fig. S10.** The grain size distribution diagram of perovskite films coated on SnO<sub>2</sub> and H-SnO<sub>2</sub> ETLs.

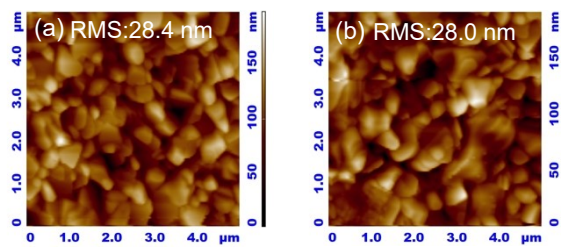

**Fig. S11.** AFM images of perovskite films deposited on (a) SnO<sub>2</sub> and (b) H-SnO<sub>2</sub>, the scan area is 5×5 μm<sup>2</sup>.

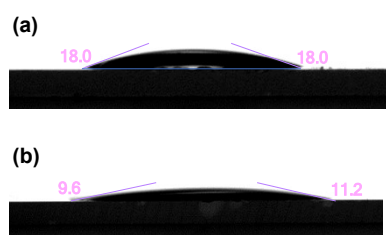

**Fig. S12.** Contact angle measurements of DMF on (a) SnO<sub>2</sub> and (b) H-SnO<sub>2</sub> film.

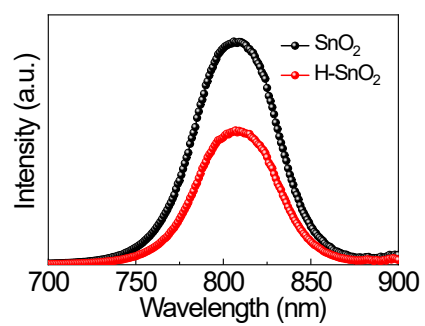

**Fig. S13.** Steady-state PL spectra of the perovskite films deposited on the SnO<sub>2</sub> and H-SnO<sub>2</sub> substrates.

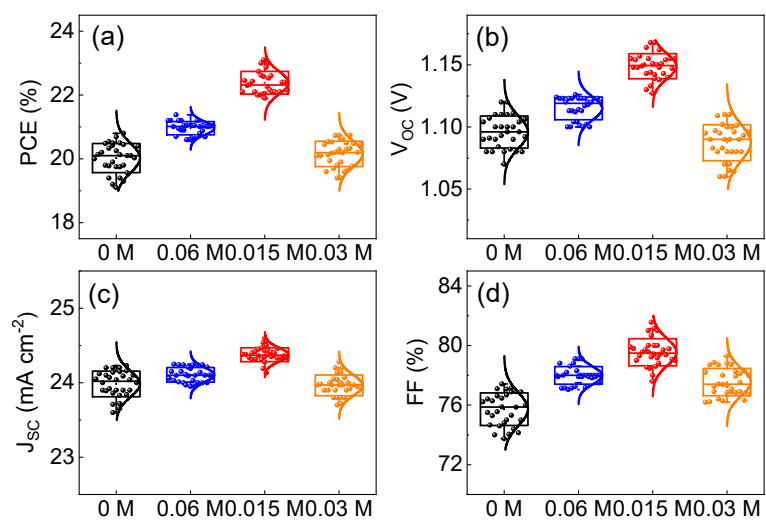

**Fig. S14.** Statistic diagram of (a) PCE, (b)  $V_{oc}$ , (c)  $J_{sc}$  and (d) FF for the PSCs based on  $\text{SnO}_2$  ETL with different concentration of HEDTA-3Na. The statistical data were collected from 30 cells for each concentration.

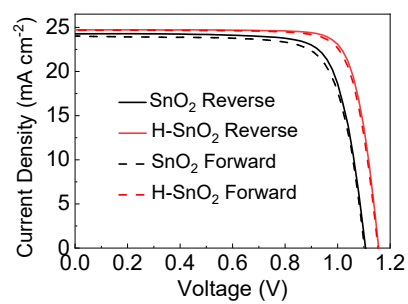

**Fig. S15.**  $J$ - $V$  curves measured by the reverse scan and forward scan of the PSCs based on pristine SnO<sub>2</sub> and H-SnO<sub>2</sub> ETLs, the photovoltaic parameters are listed in [Table S2](#).

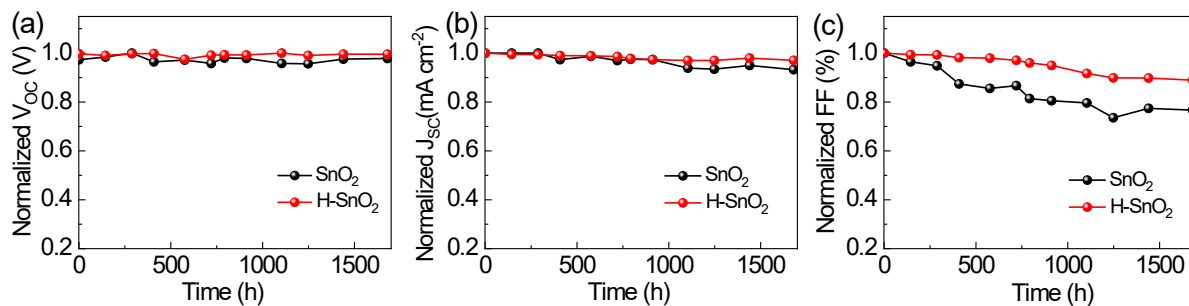

**Fig. S16.** Long-term stability of (a)  $V_{OC}$ , (b)  $J_{SC}$  and (c) FF (unencapsulated devices) for the PSCs with SnO<sub>2</sub> and H-SnO<sub>2</sub> ETLs.



**Table S1.** The TRPL spectra parameters of perovskite based on SnO<sub>2</sub> and H-SnO<sub>2</sub> ETLs.

| Samples            | A <sub>1</sub><br>(%) | $\tau_1$ (ns) | A <sub>2</sub><br>(%) | $\tau_2$ (ns) | $\tau_{ave}$ (ns) |
|--------------------|-----------------------|---------------|-----------------------|---------------|-------------------|
| SnO <sub>2</sub>   | 85.6                  | 79.2          | 14.4                  | 383           | 215.5             |
| H-SnO <sub>2</sub> | 85.2                  | 46.8          | 14.8                  | 183.3         | 101.8             |

**Table S2.** Photovoltaic parameters for PSCs made with SnO<sub>2</sub> or H-SnO<sub>2</sub> under reverse and forward scan directions.

| Samples            | Scan direction | V <sub>OC</sub> (V) | J <sub>SC</sub> (mA cm <sup>-2</sup> ) | FF (%) | PCE (%) | HI    |
|--------------------|----------------|---------------------|----------------------------------------|--------|---------|-------|
| SnO <sub>2</sub>   | Reverse        | 1.106               | 24.26                                  | 77.57  | 20.82   | 0.032 |
|                    | Forward        | 1.102               | 24.01                                  | 76.13  | 20.16   |       |
| H-SnO <sub>2</sub> | Reverse        | 1.156               | 24.72                                  | 80.86  | 23.11   | 0.014 |
|                    | Forward        | 1.154               | 24.67                                  | 80.02  | 22.78   |       |

**Table S3.** EIS parameters of devices based on SnO<sub>2</sub> and H-SnO<sub>2</sub> ETLs.

| Sample             | R <sub>tr</sub> ( $\Omega$ ) | R <sub>rec</sub> ( $\Omega$ ) |
|--------------------|------------------------------|-------------------------------|
| SnO <sub>2</sub>   | 580.6                        | 3172                          |
| H-SnO <sub>2</sub> | 317.2                        | 6021                          |
